# Supplementary material for: Effect of Exchangeable Ions in Natural and Modified Zeolites on Ag Content, Ag Nanoparticle Formation and Their Antibacterial Activity
Source: MDPI journal article supplement (doi:10.3390/ma14154153), 2021-07-26
Supplement: s1 [file s1]

Supplementary Materials

# Effect of Exchangeable Ions in Natural and Modified Zeolites on Ag Content, Ag Nanoparticle Formation and Their Antibacterial Activity

Neli Mintcheva <sup>1,\*</sup>, Marinela Panayotova <sup>1</sup>, Gospodinka Gicheva <sup>1</sup>, Orlin Gemishev <sup>2</sup> and Georgy Tyuliev <sup>3</sup>

<sup>1</sup> Department of Chemistry, University of Mining and Geology, 1700 Sofia, Bulgaria; marichim@mgu.bg (M.P.); g.gicheva@mgu.bg (G.G.)

<sup>2</sup> Faculty of Biology, Sofia University "St. Kliment Ohridski", 1000 Sofia, Bulgaria; o.gemishev@uni-sofia.bg

<sup>3</sup> Institute of Catalysis, Bulgarian Academy of Sciences, 1113 Sofia, Bulgaria; tyuliev@ic.bas.bg

\* Correspondence: nnmintcheva@mgu.bg

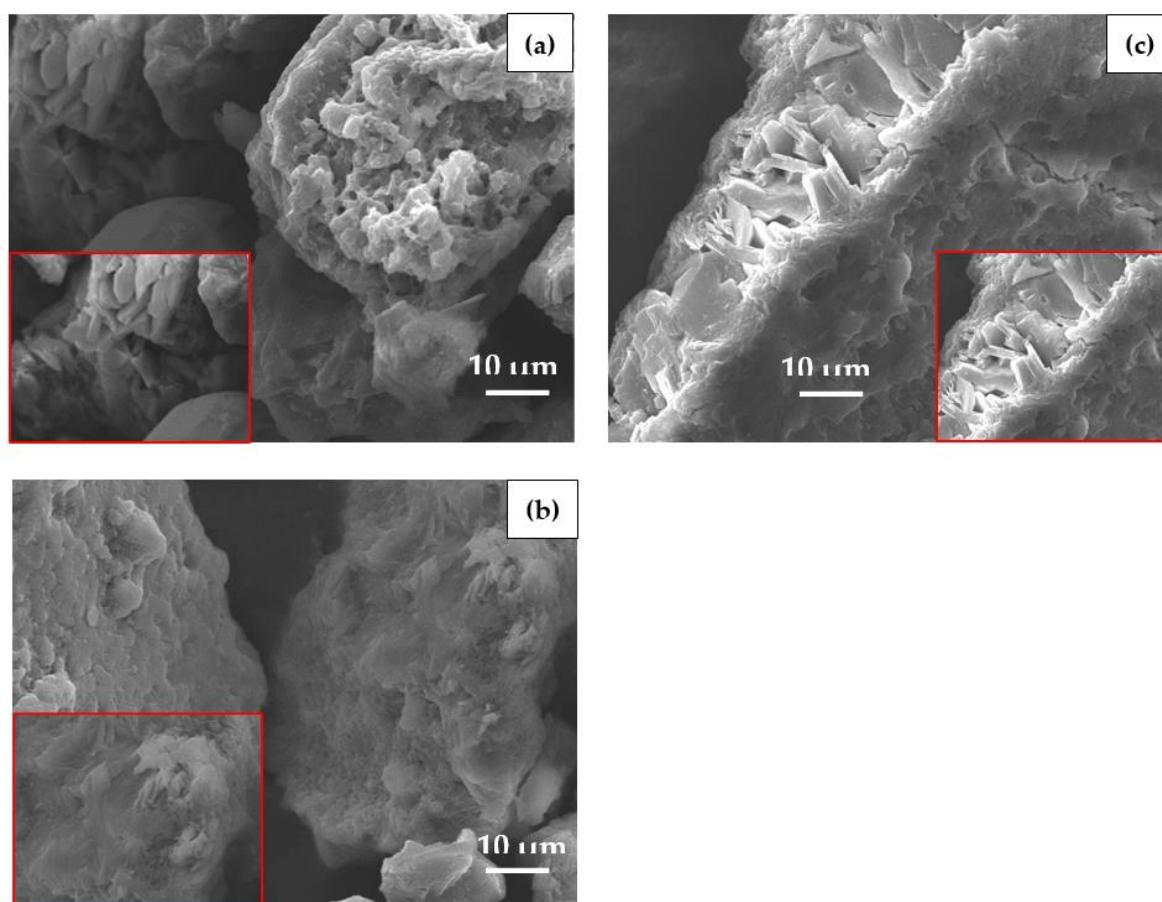

**Figure S1.** SEM micrographs of silver-zeolite composites: (a) Ag-Zeo, (b) Ag-NaZeo, (c) Ag-HZeo.

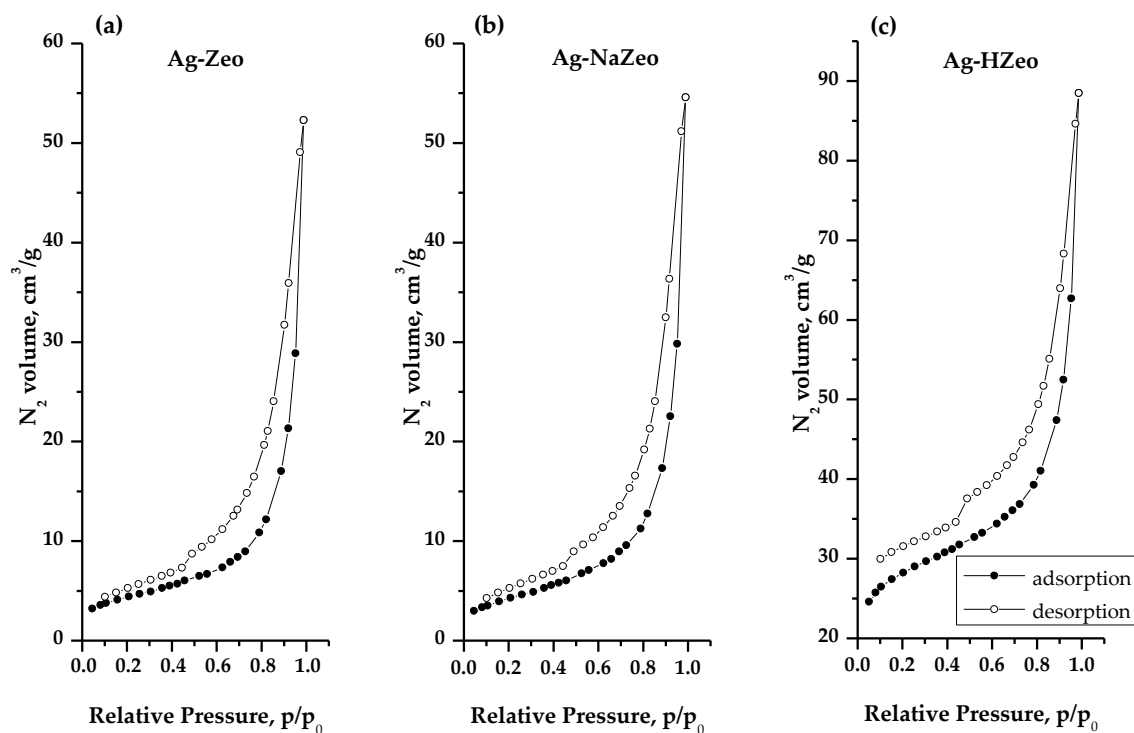

Figure S2. Adsorption-desorption isotherms for samples: (a) Ag-Zeo, (b) Ag-NaZeo and (c) Ag-HZeo.

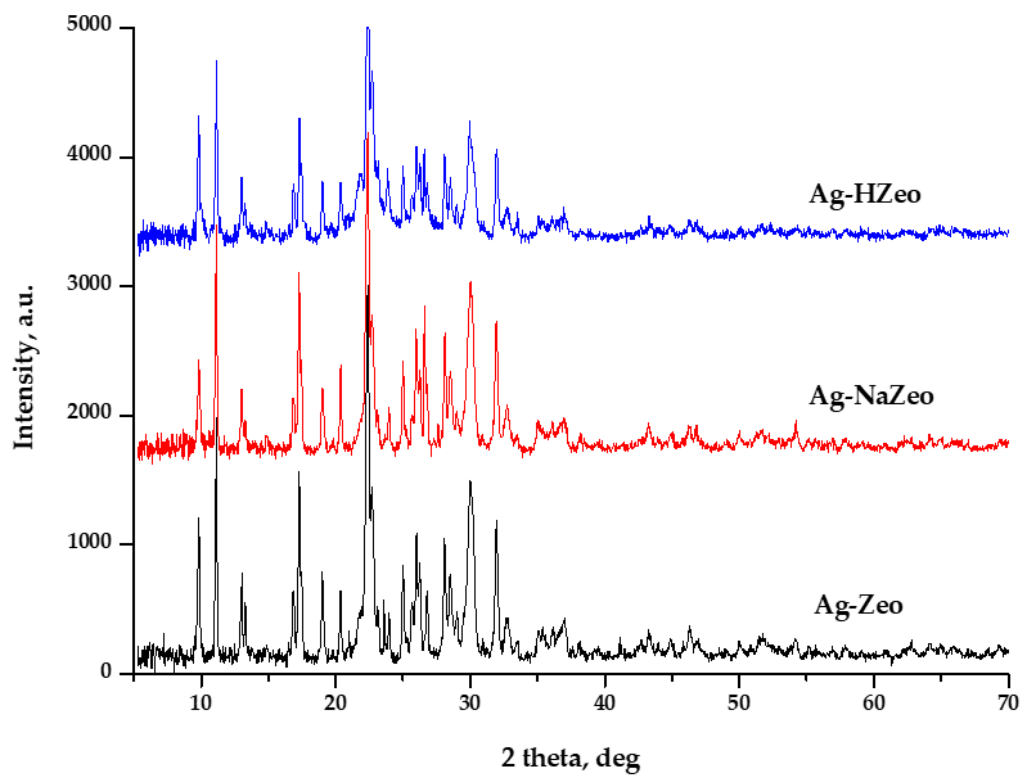

Figure S3. XRD patterns of silver-zeolite composites Ag-Zeo, Ag-NaZeo, Ag-HZeo.

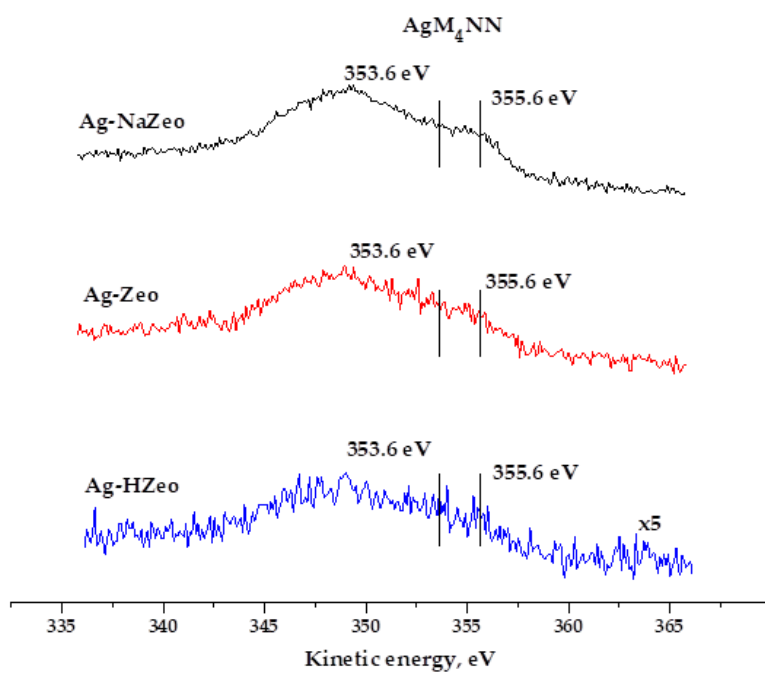

Figure S4. AgMNN Auger spectra of samples Ag-Zeo, Ag-NaZeo, Ag-HZeo.

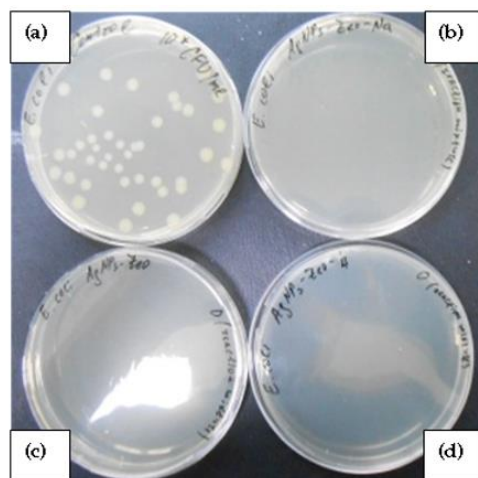

Figure S5. Antibacterial activity of silver-zeolite composites at concentration 5.0 mg/mL: (a) control sample, (b) Ag-NaZeo, (c) Ag-Zeo, (d) Ag-HZeo.

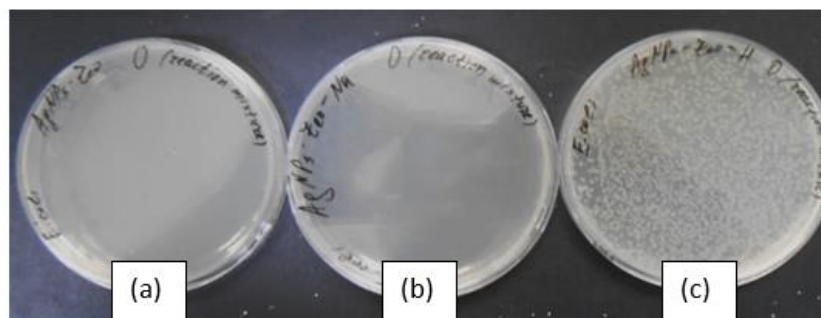

Figure S6. Antibacterial activity of silver-zeolite composites at concentration 3.0 mg/mL: (a) Ag-Zeo, (b) Ag-NaZeo, (c) Ag-HZeo.

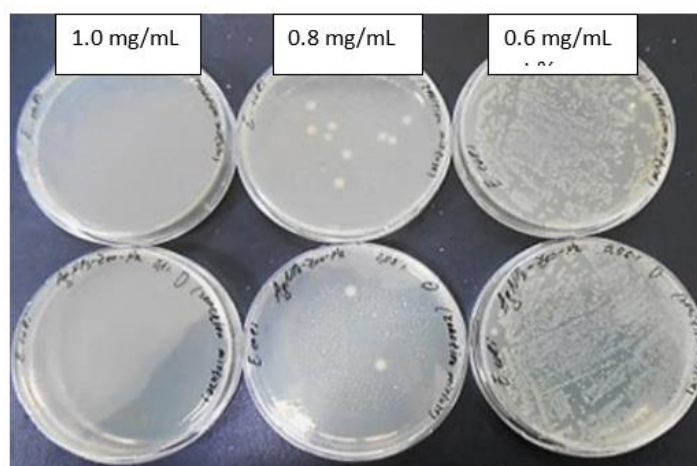

**Figure S7.** Antibacterial activity of Ag-Zeo (upper row) and Ag-NaZeo (lower row) at concentrations of 1.0, 0.8 and 0.6 mg/mL (from left to right).
